# Supplementary material for: Fish oil ameliorates neuropsychiatric behaviors and gut dysbiosis by elevating selected microbiota–derived metabolites and tissue tight junctions in rats under chronic sleep deprivation
Source: Royal Society of Chemistry journal article supplement (doi:10.1039/d2fo00181k), 2022-01-01
Supplement: d2fo00181k1.pdf [file d2fo00181k1.pdf]

**Supplement Table 1. Selected fatty acid composition in red blood cell**

| Fatty acids (%)      | Group       |              |                          |
|----------------------|-------------|--------------|--------------------------|
|                      | C           | SD           | SDF                      |
| <b>SFA</b>           | 60.3 ± 3.1  | 64.1 ± 4.7   | 59.9 ± 3.2               |
| <b>MUFA</b>          | 9.86 ± 1.21 | 7.21 ± 0.46* | 8.51 ± 0.52              |
| <b>n-6 PUFA</b>      | 25.3 ± 3.6  | 27.3 ± 2.9   | 26.1 ± 1.4               |
| C18:2 (LA)           | 7.52 ± 1.25 | 9.64 ± 1.01  | 10.50 ± 0.89             |
| C20:4 (AA)           | 16.8 ± 2.8  | 17.1 ± 1.4   | 15.6 ± 0.52              |
| <b>n-3 PUFA</b>      | 4.71 ± 0.81 | 2.60 ± 0.20* | 6.49 ± 0.54 <sup>#</sup> |
| C18:3 $\alpha$ (ALA) | 0.17 ± 0.03 | 0.16 ± 0.05  | 0.13 ± 0.05              |
| C20:5 (EPA)          | 2.22 ± 0.79 | 0.96 ± 0.21* | 2.68 ± 0.55              |
| C22:6 (DHA)          | 1.98 ± 0.74 | 1.39 ± 0.16  | 2.21 ± 0.29 <sup>#</sup> |
| <b>Ratio</b>         |             |              |                          |
| AA/EPA               | 83.1 ± 27.1 | 159.9 ± 59.2 | 45.7 ± 6.4 <sup>#</sup>  |
| AA/DHA               | 8.91 ± 2.0  | 12.6 ± 3.6   | 6.94 ± 3.66              |
| n-6/n-3              | 5.43 ± 0.44 | 10.3 ± 1.8   | 4.04 ± 0.51 <sup>#</sup> |
| <b>n-3 Index</b>     | 4.26 ± 1.21 | 2.26 ± 0.33  | 5.02 ± 0.71 <sup>#</sup> |

Data are expressed as mean ± SEM (n=8). C, control group; S, sleep deprivation; SDF, sleep deprivation + fish oil; SFA, saturated fatty acid; MUFA, monounsaturated fatty acid; PUFA, polyunsaturated fatty acid; LA, linoleic acid; AA, arachidonic acid; ALA,  $\alpha$ -linolenic acid; EPA, eicosapentaenoic acid; DPA, docosapentaenoic acid; DHA, docosapentaenoic acid. Omega-3 index: EPA+DHA. \* $p$ <0.05 compared with control group; <sup>#</sup> $p$ <0.05 compared with sleep deprivation group.

**Supplement Table 2. Selected fatty acid composition in prefrontal cortex**

| Fatty acids (%)      | Group       |                          |                          |
|----------------------|-------------|--------------------------|--------------------------|
|                      | C           | SD                       | SDF                      |
| <b>SFA</b>           | 46.2 ± 1.6  | 47.2 ± 2.5               | 46.2 ± 2.4               |
| <b>MUFA</b>          | 22.4 ± 2.4  | 21.1 ± 1.8               | 23.9 ± 2.5               |
| <b>n-6 PUFA</b>      | 13.4 ± 1.1  | 13.7 ± 1.6               | 12.9 ± 1.3               |
| C18:2 (LA)           | 1.21 ± 0.27 | 1.49 ± 0.34              | 1.35 ± 0.22              |
| C20:4 (AA)           | 12.9 ± 1.5  | 13.4 ± 1.2               | 11.7 ± 1.5               |
| <b>n-3 PUFA</b>      | 18.3 ± 1.4  | 17.4 ± 2.3               | 18.7 ± 0.5               |
| C18:3 $\alpha$ (ALA) | 0.44 ± 0.08 | 0.54 ± 0.03              | 0.41 ± 0.05 <sup>#</sup> |
| C20:5 (EPA)          | 1.59 ± 1.24 | 0.56 ± 0.13 <sup>*</sup> | 1.28 ± 0.15 <sup>#</sup> |
| C22:6 (DHA)          | 16.4 ± 0.2  | 15.7 ± 0.3 <sup>*</sup>  | 17.2 ± 0.4 <sup>#</sup>  |
| <b>Ratio</b>         |             |                          |                          |
| AA/EPA               | 8.23 ± 0.72 | 23.9 ± 1.3 <sup>*</sup>  | 9.22 ± 1.7 <sup>#</sup>  |
| AA/DHA               | 0.79 ± 0.13 | 0.84 ± 0.18              | 0.68 ± 0.19              |
| n-6/n-3              | 0.74 ± 0.21 | 0.78 ± 0.14              | 0.75 ± 0.13              |
| <b>n-3 Index</b>     | 18.0 ± 1.7  | 16.4 ± 0.9               | 18.5 ± 1.3               |

Data are expressed as mean ± SEM (n=8). C, control group; S, sleep deprivation; SDF, sleep deprivation + fish oil; SFA, saturated fatty acid; MUFA, monounsaturated fatty acid; PUFA, polyunsaturated fatty acid; LA, linoleic acid; AA, arachidonic acid; ALA,  $\alpha$ -linolenic acid; EPA, eicosapentaenoic acid; DHA, docosapentaenoic acid; DPA, docosapentaenoic acid. Omega-3 index: EPA+DHA. <sup>\*</sup> $p$ <0.05 compared with normal group; <sup>#</sup> $p$ <0.05 compared with regular group.
